# Supplementary material for: Inhibiting SLC26A4 reverses cardiac hypertrophy in H9C2 cells and in rats
Source: PeerJ. 2020 Jan 21;8:e8253. doi: 10.7717/peerj.8253 (PMC6979409; doi:10.7717/peerj.8253)
Supplement: Table S1 [file peerj-08-8253-s001.xlsx]

## Sheet: Sheet1
Grouping	α‐SMA(cell surface area)
	1	2	3
control	244962	173140	187329
PE	506249	432569	362489
Grouping	α‐SMA(Relative cell surface area)
control	1	0.706804	0.764727
PE	2.06664	1.76586	1.47978
	P value	0.0078
	P value summary	**
	Are means signif. different? (P < 0.05)	Yes
