# Supplementary material for: Inhibiting SLC26A4 reverses cardiac hypertrophy in H9C2 cells and in rats
Source: PeerJ. 2020 Jan 21;8:e8253. doi: 10.7717/peerj.8253 (PMC6979409; doi:10.7717/peerj.8253)
Supplement: Table S2 [file peerj-08-8253-s002.xlsx]

## Sheet: Sheet1
Well	Fluor	Target	Content	Sample	Cq		Grouping
A01	SYBR	GAPDH	Unkn	NC	17.7704			NC	siRNA-SLC26A4	PE+NC	PE+siRNA- SLC26A4
A02	SYBR	GAPDH	Unkn	NC	17.6885		GAPDH	17.7704	17.4574	17.7683	17.5973
A03	SYBR	GAPDH	Unkn	NC	17.8817			17.6885	17.3125	17.6018	17.5191
A04	SYBR	GAPDH	Unkn	siRNA-SLC26A4-AS1	17.4574			17.8817	17.4172	17.7648	17.477
A05	SYBR	GAPDH	Unkn	siRNA-SLC26A4-AS1	17.3125
A06	SYBR	GAPDH	Unkn	siRNA-SLC26A4-AS1	17.4172		SLC26A4	26.5836	27.4967	25.8054	25.8774		GSK-3β	32.6936	31.9584	33.3744	32.3283		ANP	24.3578	24.5989	23.7232	23.8864		BNP	25.5096	25.5918	24.6071	24.7644
A07	SYBR	GAPDH	Unkn	PE+NC	17.7683			26.4624	27.4254	25.7679	26.0098			32.7326	31.8534	33.0376	32.187			24.4988	24.6838	23.7482	24.0463			25.5011	25.774	24.7058	25.0849
A08	SYBR	GAPDH	Unkn	PE+NC	17.6018			26.5457	27.4136	26.0596	26.1719			32.6746	31.8065	32.9323	32.0643			24.5572	24.8623	23.7638	23.7833			25.7254	25.5318	24.6792	25.1878
A09	SYBR	GAPDH	Unkn	PE+NC	17.7648
A10	SYBR	GAPDH	Unkn	PE+siRNA- SLC26A4-AS1	17.5973		ΔCT	8.81318	10.0392	8.03707	8.28005		ΔCT	14.9232	14.501	15.6061	14.731		ΔCT	6.5874	7.14144	5.95489	6.28907		ΔCT	7.73917	8.13438	6.83881	7.16713
A11	SYBR	GAPDH	Unkn	PE+siRNA- SLC26A4-AS1	17.5191			8.77388	10.1129	8.1661	8.49066			15.0441	14.5409	15.4358	14.668			6.81022	7.37134	6.14647	6.52718			7.81257	8.46157	7.10405	7.56583
A12	SYBR	GAPDH	Unkn	PE+siRNA- SLC26A4-AS1	17.477			8.66397	9.99645	8.29486	8.69483			14.7929	14.3893	15.1675	14.5873			6.67553	7.44515	5.99902	6.3063			7.84374	8.11466	6.91447	7.71074
B01	SYBR	SLC26A4-AS1	Unkn	NC	26.5836
B02	SYBR	SLC26A4-AS1	Unkn	NC	26.4624		ΔCT(-)	8.75034					ΔCT(-)	14.9201					ΔCT(-)	6.69105					ΔCT(-)	7.79849
B03	SYBR	SLC26A4-AS1	Unkn	NC	26.5457
B04	SYBR	SLC26A4-AS1	Unkn	siRNA-SLC26A4-AS1	27.4967		ΔΔCT	0.0628364	1.2889	-0.713276	-0.47029		ΔΔCT	0.00317237	-0.419101	0.685989	-0.189085		ΔΔCT	-0.103649	0.450396	-0.736158	-0.401981		ΔΔCT	-0.0593228	0.335888	-0.959687	-0.63136
B05	SYBR	SLC26A4-AS1	Unkn	siRNA-SLC26A4-AS1	27.4254			0.0235372	1.36255	-0.584248	-0.25968			0.124013	-0.379157	0.51577	-0.252101			0.119171	0.680294	-0.544575	-0.163868			0.0140766	0.663079	-0.694442	-0.232658
B06	SYBR	SLC26A4-AS1	Unkn	siRNA-SLC26A4-AS1	27.4136			-0.0863736	1.24611	-0.45548	-0.0555132			-0.127185	-0.530729	0.247484	-0.332741			-0.0155216	0.754099	-0.692032	-0.384748			0.0452463	0.316166	-0.884022	-0.0877561
B07	SYBR	SLC26A4-AS1	Unkn	PE+NC	25.8054
B08	SYBR	SLC26A4-AS1	Unkn	PE+NC	25.7679		2-ΔΔCT	0.95738	0.409263	1.63952	1.38539		2-ΔΔCT	0.997803	1.33709	0.62158	1.14004		2-ΔΔCT	1.07449	0.731842	1.66573	1.32132		2-ΔΔCT	1.04198	0.792296	1.94489	1.54902
B09	SYBR	SLC26A4-AS1	Unkn	PE+NC	26.0596			0.983818	0.388893	1.49926	1.19721			0.917632	1.30058	0.699419	1.19094			0.920717	0.624038	1.45859	1.12029			0.99029	0.631529	1.61826	1.175
B10	SYBR	SLC26A4-AS1	Unkn	PE+siRNA- SLC26A4-AS1	25.8774			1.0617	0.421584	1.37124	1.03923			1.09216	1.44466	0.842364	1.2594			1.01082	0.592917	1.61556	1.30563			0.969124	0.803201	1.84551	1.06272
B11	SYBR	SLC26A4-AS1	Unkn	PE+siRNA- SLC26A4-AS1	26.0098
B12	SYBR	SLC26A4-AS1	Unkn	PE+siRNA- SLC26A4-AS1	26.1719		mean	1.00097	0.40658	1.50334	1.20728		mean	1.00253	1.36078	0.721121	1.19679		mean	1.00201	0.649599	1.57996	1.24908		mean	1.00046	0.742342	1.80289	1.26225
C01	SYBR	GSK-3β	Unkn	NC	32.6936		SD	0.0542319	0.0165095	0.134189	0.173299		SD	0.0873603	0.0749018	0.111981	0.0598968		SD	0.0772632	0.0729045	0.108062	0.111814		SD	0.0374765	0.0961218	0.167435	0.254624
C02	SYBR	GSK-3β	Unkn	NC	32.7326
C03	SYBR	GSK-3β	Unkn	NC	32.6746
C04	SYBR	GSK-3β	Unkn	siRNA-SLC26A4-AS1	31.9584
C05	SYBR	GSK-3β	Unkn	siRNA-SLC26A4-AS1	31.8534
C06	SYBR	GSK-3β	Unkn	siRNA-SLC26A4-AS1	31.8065			P value	< 0.0001					P value	< 0.0001					P value	< 0.0001					P value	0.0004
C07	SYBR	GSK-3β	Unkn	PE+NC	33.3744			P value summary	***					P value summary	***					P value summary	***					P value summary	***
C08	SYBR	GSK-3β	Unkn	PE+NC	33.0376			Are means signif. different? (P < 0.05)	Yes					Are means signif. different? (P < 0.05)	Yes					Are means signif. different? (P < 0.05)	Yes					Are means signif. different? (P < 0.05)	Yes
C09	SYBR	GSK-3β	Unkn	PE+NC	32.9323			Tukey's Multiple Comparison Test	Significant? P < 0.05?	Summary				Tukey's Multiple Comparison Test	Significant? P < 0.05?	Summary				Tukey's Multiple Comparison Test	Significant? P < 0.05?	Summary				Tukey's Multiple Comparison Test	Significant? P < 0.05?	Summary
C10	SYBR	GSK-3β	Unkn	PE+siRNA- SLC26A4-AS1	32.3283			NC vs siRNA-SLC26A4	Yes	***				NC vs siRNA-SLC26A4	Yes	**				NC vs siRNA-SLC26A4	Yes	*				NC vs siRNA-SLC26A4	No	ns
C11	SYBR	GSK-3β	Unkn	PE+siRNA- SLC26A4-AS1	32.187			NC vs PE+NC	Yes	**				NC vs PE+NC	Yes	*				NC vs PE+NC	Yes	***				NC vs PE+NC	Yes	**
C12	SYBR	GSK-3β	Unkn	PE+siRNA- SLC26A4-AS1	32.0643			NC vs PE+siRNA- SLC26A4	No	ns				NC vs PE+siRNA- SLC26A4	No	ns				NC vs PE+siRNA- SLC26A4	Yes	*				NC vs PE+siRNA- SLC26A4	No	ns
D01	SYBR	ANP	Unkn	NC	24.3578			siRNA-SLC26A4 vs PE+NC	Yes	***				siRNA-SLC26A4 vs PE+NC	Yes	***				siRNA-SLC26A4 vs PE+NC	Yes	***				siRNA-SLC26A4 vs PE+NC	Yes	***
D02	SYBR	ANP	Unkn	NC	24.4988			siRNA-SLC26A4 vs PE+siRNA- SLC26A4	Yes	***				siRNA-SLC26A4 vs PE+siRNA- SLC26A4	No	ns				siRNA-SLC26A4 vs PE+siRNA- SLC26A4	Yes	***				siRNA-SLC26A4 vs PE+siRNA- SLC26A4	Yes	*
D03	SYBR	ANP	Unkn	NC	24.5572			PE+NC vs PE+siRNA- SLC26A4	Yes	*				PE+NC vs PE+siRNA- SLC26A4	Yes	***				PE+NC vs PE+siRNA- SLC26A4	Yes	**				PE+NC vs PE+siRNA- SLC26A4	Yes	*
D04	SYBR	ANP	Unkn	siRNA-SLC26A4-AS1	24.5989
D05	SYBR	ANP	Unkn	siRNA-SLC26A4-AS1	24.6838
D06	SYBR	ANP	Unkn	siRNA-SLC26A4-AS1	24.8623
D07	SYBR	ANP	Unkn	PE+NC	23.7232
D08	SYBR	ANP	Unkn	PE+NC	23.7482
D09	SYBR	ANP	Unkn	PE+NC	23.7638
D10	SYBR	ANP	Unkn	PE+siRNA- SLC26A4-AS1	23.8864
D11	SYBR	ANP	Unkn	PE+siRNA- SLC26A4-AS1	24.0463
D12	SYBR	ANP	Unkn	PE+siRNA- SLC26A4-AS1	23.7833
E01	SYBR	BNP	Unkn	NC	25.5096
E02	SYBR	BNP	Unkn	NC	25.5011
E03	SYBR	BNP	Unkn	NC	25.7254
E04	SYBR	BNP	Unkn	siRNA-SLC26A4-AS1	25.5918
E05	SYBR	BNP	Unkn	siRNA-SLC26A4-AS1	25.774
E06	SYBR	BNP	Unkn	siRNA-SLC26A4-AS1	25.5318
E07	SYBR	BNP	Unkn	PE+NC	24.6071
E08	SYBR	BNP	Unkn	PE+NC	24.7058
E09	SYBR	BNP	Unkn	PE+NC	24.6792
E10	SYBR	BNP	Unkn	PE+siRNA- SLC26A4-AS1	24.7644
E11	SYBR	BNP	Unkn	PE+siRNA- SLC26A4-AS1	25.0849
E12	SYBR	BNP	Unkn	PE+siRNA- SLC26A4-AS1	25.1878
