# Supplementary material for: Inhibiting SLC26A4 reverses cardiac hypertrophy in H9C2 cells and in rats
Source: PeerJ. 2020 Jan 21;8:e8253. doi: 10.7717/peerj.8253 (PMC6979409; doi:10.7717/peerj.8253)
Supplement: Table S3 [file peerj-08-8253-s003.xlsx]

## Sheet: Sheet1
Grouping	α‐SMA(cell surface area)
	1	2	3
control	219895	169097	182015
siRNA-SLC26A4	121504	112097	112161
PE+NC	476586	479800	476531
PE+siRNA- SLC26A4	295378	264446	292153
Grouping	α‐SMA(Relative cell surface area)
control	1	0.76899	0.827736
siRNA-SLC26A4	0.552555	0.509775	0.510066
PE+NC	2.16733	2.18195	2.16708
PE+siRNA- SLC26A4	1.34327	1.2026	1.3286
	P value	< 0.0001
	P value summary	***
	Are means signif. different? (P < 0.05)	Yes
	Tukey's Multiple Comparison Test	Significant? P < 0.05?	Summary
	control vs siRNA-SLC26A4	Yes	**
	control vs PE+NC	Yes	***
	control vs PE+siRNA- SLC26A4	Yes	***
	siRNA-SLC26A4 vs PE+NC	Yes	***
	siRNA-SLC26A4 vs PE+siRNA- SLC26A4	Yes	***
	PE+NC vs PE+siRNA- SLC26A4	Yes	***
