# Supplementary material for: Inhibiting SLC26A4 reverses cardiac hypertrophy in H9C2 cells and in rats
Source: PeerJ. 2020 Jan 21;8:e8253. doi: 10.7717/peerj.8253 (PMC6979409; doi:10.7717/peerj.8253)
Supplement: Table S4 [file peerj-08-8253-s004.xlsx]

## Sheet: Sheet1
Grouping	LC3 grayscale value	P62 grayscale value	GAPDH grayscale value
NC	14731.9	28363.5	37962.1
sirna-SLC26A4	3777.83	41208.3	34838.4
PE+NC	38698.6	13536.2	39722.9
PE+sirna-SLC26A4	30111.9	33793.9	36988.8
Grouping	LC3/GAPDH grayscale value	P62/GAPDH grayscale value
NC	0.38807	0.747153
sirna-SLC26A4	0.108439	1.18284
PE+NC	0.974213	0.340766
PE+sirna-SLC26A4	0.814081	0.913626
Grouping	LC3 Relative expression	P62 Relative expression
NC	1	1
sirna-SLC26A4	0.279431	1.58313
PE+NC	2.51041	0.456085
PE+sirna-SLC26A4	2.09777	1.22281
