# Supplementary material for: Inhibiting SLC26A4 reverses cardiac hypertrophy in H9C2 cells and in rats
Source: PeerJ. 2020 Jan 21;8:e8253. doi: 10.7717/peerj.8253 (PMC6979409; doi:10.7717/peerj.8253)
Supplement: Table S5 [file peerj-08-8253-s005.xlsx]

## Sheet: Sheet1
Grouping	NC
	siRNA-SLC26A4
	PE+NC
	PE+siRNA- SLC26A4
Grouping1	Percentage of apoptosis（%）
	UR	LR	Total		AVERAGE
NC	7.01	3.01	10.02		9.47333
	6.33	2.63	8.96
	6.9	2.54	9.44
siRNA-SLC26A4	10.06	8.7	18.76		19
	10.27	8.85	19.12
	10.46	8.66	19.12
PE+NC	2.69	3.51	6.2		6.25
	2.99	3.4	6.39
	2.95	3.21	6.16
PE+siRNA- SLC26A4	8.09	3.44	11.53		11.5067
	7.9	3.61	11.51
	8.43	3.05	11.48
	P value	< 0.0001
	P value summary	***
	Are means signif. different? (P < 0.05)	Yes
	Tukey's Multiple Comparison Test	Significant? P < 0.05?	Summary
	NC vs siRNA-SLC26A4	Yes	***
	NC vs PE+NC	Yes	***
	NC vs PE+siRNA- SLC26A4	Yes	***
	siRNA-SLC26A4 vs PE+NC	Yes	***
	siRNA-SLC26A4 vs PE+siRNA- SLC26A4	Yes	***
	PE+NC vs PE+siRNA- SLC26A4	Yes	***
