# Supplementary material for: Inhibiting SLC26A4 reverses cardiac hypertrophy in H9C2 cells and in rats
Source: PeerJ. 2020 Jan 21;8:e8253. doi: 10.7717/peerj.8253 (PMC6979409; doi:10.7717/peerj.8253)
Supplement: Table S6 [file peerj-08-8253-s006.xlsx]

## Sheet: a-SMA+beclin-1
Grouping	a-SMA grayscale value	Beclin-1 grayscale value	GAPDH grayscale value		Grouping	a-SMA grayscale value	Beclin-1 grayscale value	GAPDH grayscale value		Grouping	a-SMA grayscale value	Beclin-1 grayscale value	GAPDH grayscale value
NC	16203.4	29106.2	37962.1		NC	14506.1	25620.4	38311.1		NC	13480.9	31015.6	38511.1
sirna-SLC26A4-AS1	8998.82	14228.7	34838.4		sirna-SLC26A4-AS1	6669.25	13596.3	35287.4		sirna-SLC26A4-AS1	5606.75	10259.4	35487.4
PE+NC	47496.9	49478.9	39722.9		PE+NC	42156.6	39588	40111.9		PE+NC	36588	42659	40311.9
PE+sirna-SLC26A4-AS1	24191.6	35326	36988.8		PE+sirna-SLC26A4-AS1	20222.5	28650.9	37327.8		PE+sirna-SLC26A4-AS1	25200.8	33261	37527.8
Grouping	a-SMA/GAPDH grayscale value	Beclin-1/GAPDH grayscale value			Grouping	a-SMA/GAPDH grayscale value	Beclin-1/GAPDH grayscale value			Grouping	a-SMA/GAPDH grayscale value	Beclin-1/GAPDH grayscale value
NC	0.426832	0.766717			NC	0.378641	0.668746			NC	0.350051	0.805369
sirna-SLC26A4-AS1	0.258302	0.408419			sirna-SLC26A4-AS1	0.188998	0.3853			sirna-SLC26A4-AS1	0.157993	0.289099
PE+NC	1.19571	1.2456			PE+NC	1.05097	0.986938			PE+NC	0.907622	1.05822
PE+sirna-SLC26A4-AS1	0.654025	0.955046			PE+sirna-SLC26A4-AS1	0.541753	0.767548			PE+sirna-SLC26A4-AS1	0.671522	0.886302
Grouping	a-SMA Relative expression	Beclin-1 Relative expression			Grouping	a-SMA Relative expression	Beclin-1 Relative expression			Grouping	a-SMA Relative expression	Beclin-1 Relative expression
NC	1	1			NC	1	1			NC	1	1
sirna-SLC26A4-AS1	0.605161	0.532686			sirna-SLC26A4-AS1	0.499148	0.576154			sirna-SLC26A4-AS1	0.451342	0.358964
PE+NC	2.80135	1.62459			PE+NC	2.77565	1.4758			PE+NC	2.59282	1.31396
PE+sirna-SLC26A4-AS1	1.53228	1.24563			PE+sirna-SLC26A4-AS1	1.43078	1.14774			PE+sirna-SLC26A4-AS1	1.91835	1.10049

## Sheet: LC3+p62
Grouping	LC3 grayscale value	P62 grayscale value	GAPDH grayscale value		Grouping	LC3 grayscale value	P62 grayscale value	GAPDH grayscale value		Grouping	LC3 grayscale value	P62 grayscale value	GAPDH grayscale value
NC	14731.9	28363.5	37962.1		NC	16731.1	25874.2	38311.1		NC	13880.9	30752.3	38511.1
sirna-SLC26A4-AS1	3777.83	41208.3	34838.4		sirna-SLC26A4-AS1	5777.52	42719.2	35287.4		sirna-SLC26A4-AS1	3026.88	43597.7	35487.4
PE+NC	38698.6	13536.2	39722.9		PE+NC	40698.5	11047.6	40111.9		PE+NC	37887.6	16925.8	40311.9
PE+sirna-SLC26A4-AS1	30111.9	33793.9	36988.8		PE+sirna-SLC26A4-AS1	32111.1	29304.9	37327.8		PE+sirna-SLC26A4-AS1	29250.4	32182.8	37527.8
Grouping	LC3/GAPDH grayscale value	P62/GAPDH grayscale value			Grouping	LC3/GAPDH grayscale value	P62/GAPDH grayscale value			Grouping	LC3/GAPDH grayscale value	P62/GAPDH grayscale value
NC	0.38807	0.747153			NC	0.436718	0.675373			NC	0.360438	0.798532
sirna-SLC26A4-AS1	0.108439	1.18284			sirna-SLC26A4-AS1	0.163728	1.21061			sirna-SLC26A4-AS1	0.0852943	1.22854
PE+NC	0.974213	0.340766			PE+NC	1.01463	0.275419			PE+NC	0.939861	0.419872
PE+sirna-SLC26A4-AS1	0.814081	0.913626			PE+sirna-SLC26A4-AS1	0.860246	0.785068			PE+sirna-SLC26A4-AS1	0.779432	0.857571
Grouping	LC3 Relative expression	P62 Relative expression			Grouping	LC3 Relative expression	P62 Relative expression			Grouping	LC3 Relative expression	P62 Relative expression
NC	1	1			NC	1	1			NC	1	1
sirna-SLC26A4-AS1	0.279431	1.58313			sirna-SLC26A4-AS1	0.374905	1.7925			sirna-SLC26A4-AS1	0.236641	1.5385
PE+NC	2.51041	0.456085			PE+NC	2.3233	0.407802			PE+NC	2.60755	0.525804
PE+sirna-SLC26A4-AS1	2.09777	1.22281			PE+sirna-SLC26A4-AS1	1.9698	1.16242			PE+sirna-SLC26A4-AS1	2.16246	1.07393
