# Supplementary material for: Inhibiting SLC26A4 reverses cardiac hypertrophy in H9C2 cells and in rats
Source: PeerJ. 2020 Jan 21;8:e8253. doi: 10.7717/peerj.8253 (PMC6979409; doi:10.7717/peerj.8253)
Supplement: Table S7 [file peerj-08-8253-s007.xls]

## Sheet: Sheet1
	ANP							BNP							GSK3β
	Grouping	Area	IOD	IOD/Area	Relative expression			Grouping	Area	IOD	IOD/Area	Relative expression			Grouping	Area	IOD	IOD/Area	Relative expression
	normal	2792	80.184	0.0287192	1			normal	2259	84.919	0.0375914	1			normal	873984	324030	0.37075	1
		1553	52.175	0.0335963	1.16982				2339	106.438	0.0455058	1.21054				761423	225974	0.296778	0.800481
		2315	69.164	0.0298765	1.0403				2773	169.504	0.0611266	1.62608				832277	254566	0.305867	0.824994
	cardiac hypertrophy	502836	124813	0.248218	8.64291			cardiac hypertrophy	187050	91599.5	0.489706	13.0271			cardiac hypertrophy	451313	63370	0.140413	0.378726
		308105	82916.8	0.269119	9.37069				213596	85541.9	0.400485	10.6536				499621	59369.5	0.118829	0.32051
		305106	66176.5	0.216897	7.55232				111106	42786.2	0.385093	10.2442				385368	69032.7	0.179135	0.483168
	cardiac hypertrophy+ siRNA-SLC26A4	2196	79.376	0.0361457	1.25859			cardiac hypertrophy+ siRNA-SLC26A4	1293	76.374	0.0590673	1.5713			cardiac hypertrophy+ siRNA-SLC26A4	837899	298288	0.355995	0.960203
		1848	110.227	0.0596466	2.07689				2801	97.26	0.0347233	0.923703				895606	298443	0.33323	0.8988
		1529	52.508	0.0343414	1.19576				2722	122.431	0.0449783	1.19651				872910	317001	0.363154	0.979512
				ANP							BNP								GSK3β
				P value	< 0.0001						P value	< 0.0001							P value	0.0003
				P value summary	***						P value summary	***							P value summary	***
				Are means signif. different? (P < 0.05)	Yes						Are means signif. different? (P < 0.05)	Yes							Are means signif. different? (P < 0.05)	Yes
				Tukey's Multiple Comparison Test	Significant? P < 0.05?	Summary					Tukey's Multiple Comparison Test	Significant? P < 0.05?	Summary						Tukey's Multiple Comparison Test	Significant? P < 0.05?	Summary
				normal vs cardiac hypertrophy	Yes	***					normal vs cardiac hypertrophy	Yes	***						normal vs cardiac hypertrophy	Yes	***
				normal vs cardiac hypertrophy+ siRNA-SLC	No	ns					normal vs cardiac hypertrophy+ siRNA-SLC	No	ns						normal vs cardiac hypertrophy+ siRNA-SLC	No	ns
				cardiac hypertrophy vs cardiac hypertrophy+ siRNA-SLC	Yes	***					cardiac hypertrophy vs cardiac hypertrophy+ siRNA-SLC	Yes	***						cardiac hypertrophy vs cardiac hypertrophy+ siRNA-SLC	Yes	***
