# Supplementary material for: Inhibiting SLC26A4 reverses cardiac hypertrophy in H9C2 cells and in rats
Source: PeerJ. 2020 Jan 21;8:e8253. doi: 10.7717/peerj.8253 (PMC6979409; doi:10.7717/peerj.8253)
Supplement: Table S8 [file peerj-08-8253-s008.xlsx]

## Sheet: Sheet1
	Normal				Cardiac hypertrophy				Cardiac hypertrophy+ siSLC26A4
1	20.26	23.26	22.36	23.26	22.83	22.47	24.32	23.58	24.63	21.58	19.95	22.19
2	20.48	21.95	21.26	21.25	21.07	21.01	23.1	22.79	23.06	19.22	18.36	19.73
3	20.98	23.88	23.37	21.52	22.22	22.9	24.03	24.56	24.46	20.39	19.68	20.51
4	19.83	23.06	22.74	23.26	23.06	22.58	21.36	21.42	24.73	21.4	19.36	22.94
5	20.44	21.07	23.1	23	21.46	22.43	20.65	20.61	24.31	20.61	20.65	22.86
6	21.18	22.74	24.98	24.5	22.54	22.4	21.89	22.37	25.44	21.3	22.01	24.13
7	24.36	23.71	20.74	20.83	20.95	21.67	24.52	21.53	22.73	20.69	21.09	22.55
